# Supplementary material for: Interaction Study between ESIPT Fluorescent Lipophile-Based Benzazoles and BSA
Source: MDPI journal article supplement (doi:10.3390/molecules26216728), 2021-11-06
Supplement: s1 [file s1]

## **Interaction study between ESIPT fluorescent lipophile-based benzazoles and BSA**

Thais Kroetz,<sup>1</sup> Pablo Andrei Nogara,<sup>2</sup> Fabiano da Silveira Santos,<sup>1,3</sup> Lilian Camargo da Luz,<sup>1</sup> Viktor Saraiva Câmara,<sup>1</sup> João Batista Teixeira da Rocha,<sup>2</sup> Alexandre Gonçalves Dal-Bó,<sup>3</sup> Fabiano Severo Rodembusch,<sup>1,\*</sup>

<sup>1</sup>Grupo de Pesquisa em Fotoquímica Orgânica Aplicada, Instituto de Química, Universidade Federal do Rio Grande do Sul, Av. Bento Gonçalves 9500, Porto Alegre, RS, Brazil; e-mails: kroetzthais@gmail.com (T.K.); lilian.luz@ufrgs.br (L.C.L.); fabiano@ufrgs.br (F.S.S.); viktor.saraiva@gmail.com (V.S.C.); rodembusch@iq.ufrgs.br (F.S.R.)

<sup>2</sup>Departamento de Bioquímica e Biologia Molecular, Centro de Ciências Naturais e Exatas, Universidade Federal de Santa Maria - UFSM, RS, Brazil; e-mails: pbnogara@gmail.com (P.A.N.); jbtrocha@yahoo.com.br (J.B.T.R.)

<sup>3</sup>Universidade do Extremo Sul Catarinense – UNESC, Av. Universitária 1105, CEP 88806-000, Criciúma, SC, Brazil; e-mails: fabiano@ufrgs.br (F.S.S.); adalbo@unesc.net (A.G.D.)

\*Author to whom correspondence should be addressed; e-mail: rodembusch@iq.ufrgs.br (F.S.R.); Tel.: +55 51 3308 9639; Fax: +55 51 3308 7304.

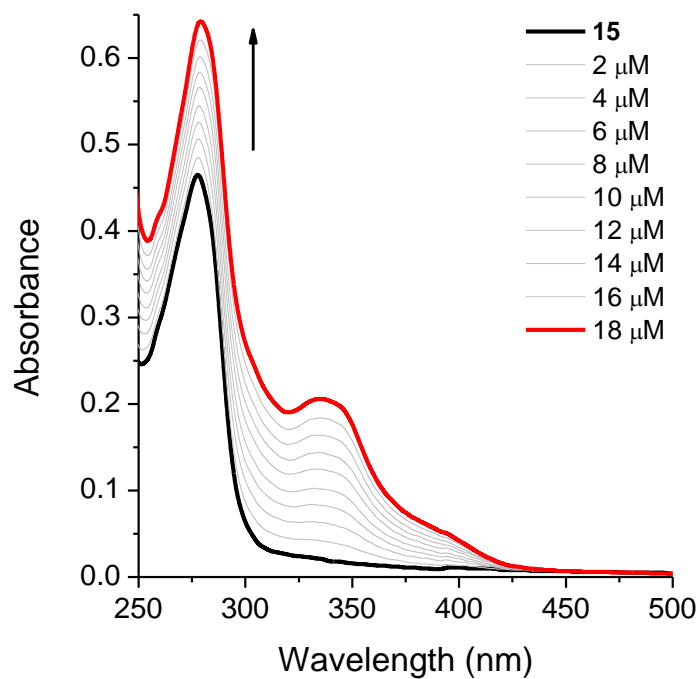

**Figure S1.** UV-Vis absorption spectra for BSA (11 μM) in PBS (pH 7.2) in the absence and presence of different amounts of compound **15** (0 to 20 μM).

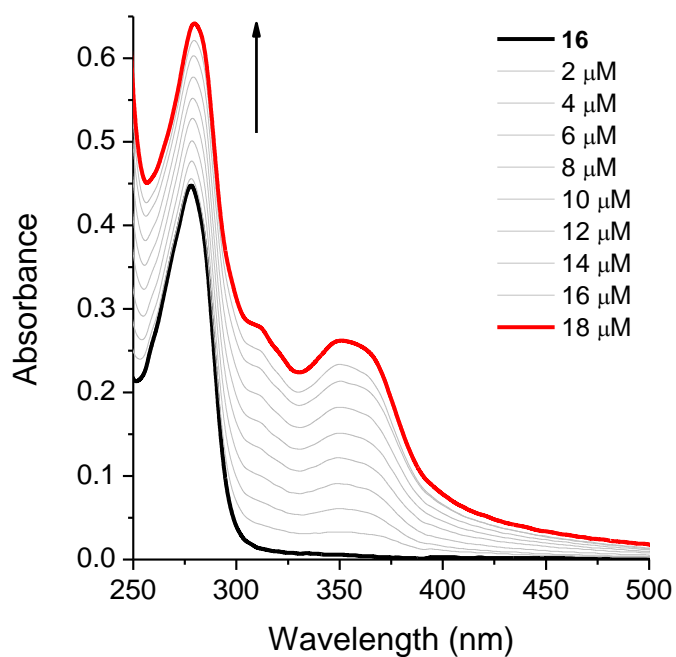

**Figure S2.** UV-Vis absorption spectra for BSA (11 μM) in PBS (pH 7.2) in the absence and presence of different amounts of compound **16** (0 to 20 μM).

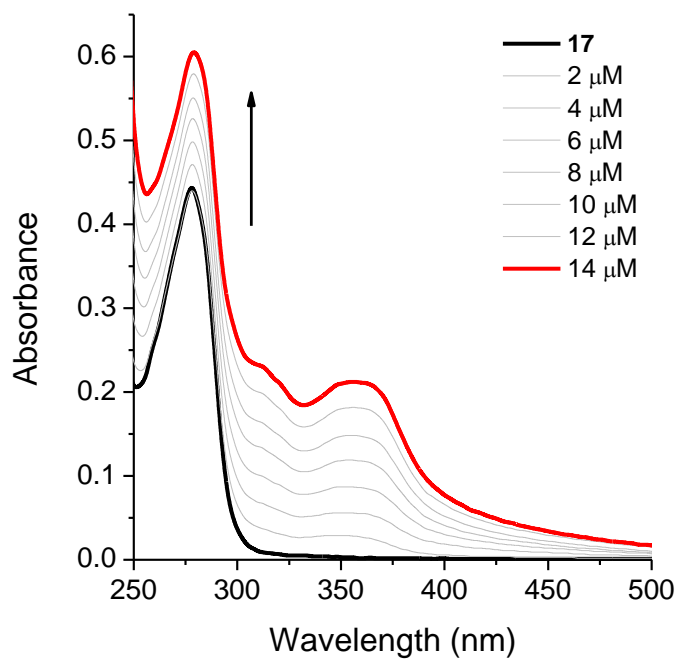

**Figure S3.** UV-Vis absorption spectra for BSA (11  $\mu\text{M}$ ) in PBS (pH 7.2) in the absence and presence of different amounts of compound **17** (0 to 20  $\mu\text{M}$ ).

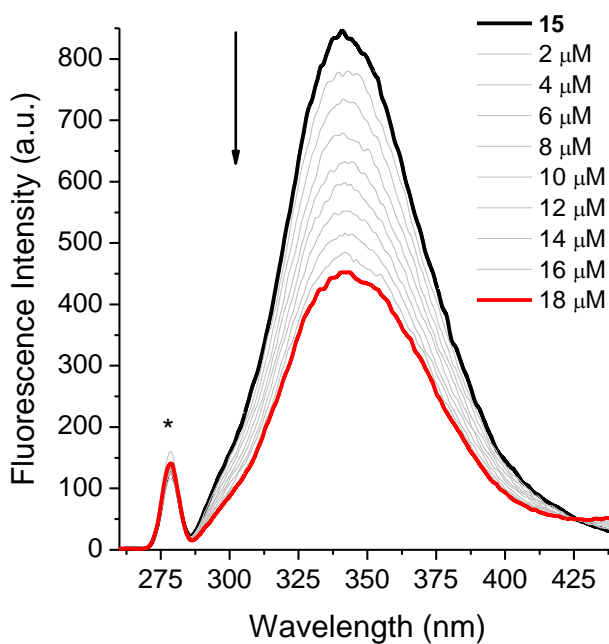

**Figure S4.** Steady-state fluorescence emission spectra for BSA (11  $\mu\text{M}$ ) in PBS (pH 7.2) in the absence and presence of different amounts of compound **15** (0 to 20  $\mu\text{M}$ ). The asterisk is related to the excitation wavelength. ( $\lambda_{\text{ex}} = 277 \text{ nm}$ , Slits (Ex/Em) = 5.0 nm/5.0 nm)

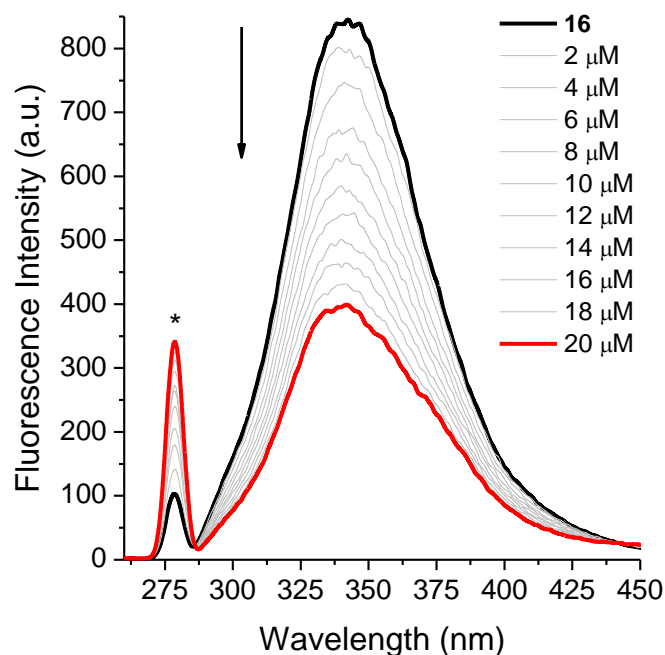

**Figure S5.** Steady-state fluorescence emission spectra for BSA (11  $\mu\text{M}$ ) in PBS (pH 7.2) in the absence and presence of different amounts of compound **16** (0 to 20  $\mu\text{M}$ ). The asterisk is related to the excitation wavelength. ( $\lambda_{\text{ex}} = 277 \text{ nm}$ , Slits (Ex/Em) = 5.0 nm/5.0 nm)

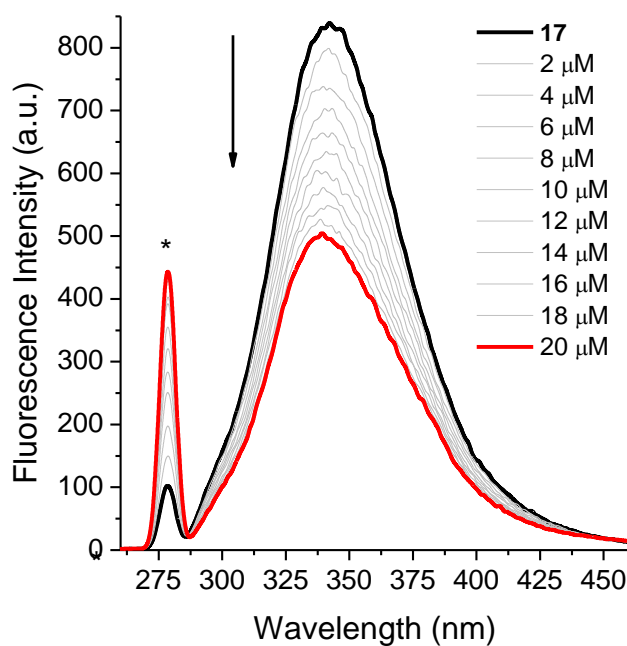

**Figure S6.** Steady-state fluorescence emission spectra for BSA (11  $\mu\text{M}$ ) in PBS (pH 7.2) in the absence and presence of different amounts of compound **17** (0 to 20  $\mu\text{M}$ ). The asterisk is related to the excitation wavelength. ( $\lambda_{\text{ex}} = 277 \text{ nm}$ , Slits (Ex/Em) = 5.0 nm/5.0 nm)

**Table S1.** Linear equations and respective coefficient of determination ( $R^2$ ) from the plot  $F_0/F$  vs.  $[Q]$  (Stern-Volmer relation) and  $\log [(F_0-F)/F]$  vs.  $\log [Q]$  (double log plot).

| Benzazole | Stern-Volmer relation               |        | Double log plot                    |        |
|-----------|-------------------------------------|--------|------------------------------------|--------|
|           | Equation                            | $R^2$  | Equation                           | $R^2$  |
| <b>12</b> | $F_0/F=3.14 \times 10^4 [Q]+1.0022$ | 0.9969 | $\log(F_0-F/F)=4.10+0.92 \log [Q]$ | 0.9928 |
| <b>13</b> | $F_0/F=5.12 \times 10^4 [Q]+0.9746$ | 0.9986 | $\log(F_0-F/F)=5.50+1.16 \log [Q]$ | 0.9953 |
| <b>14</b> | $F_0/F=3.18 \times 10^4 [Q]+1.0180$ | 0.9927 | $\log(F_0-F/F)=3.91+0.88 \log [Q]$ | 0.9878 |
| <b>15</b> | $F_0/F=4.66 \times 10^4 [Q]+0.9663$ | 0.9916 | $\log(F_0-F/F)=5.35+1.15 \log [Q]$ | 0.9983 |
| <b>16</b> | $F_0/F=5.62 \times 10^4 [Q]+0.9237$ | 0.9859 | $\log(F_0-F/F)=6.18+1.31 \log [Q]$ | 0.9989 |
| <b>17</b> | $F_0/F=3.46 \times 10^4 [Q]+0.9890$ | 0.9975 | $\log(F_0-F/F)=4.95+1.09 \log [Q]$ | 0.9933 |

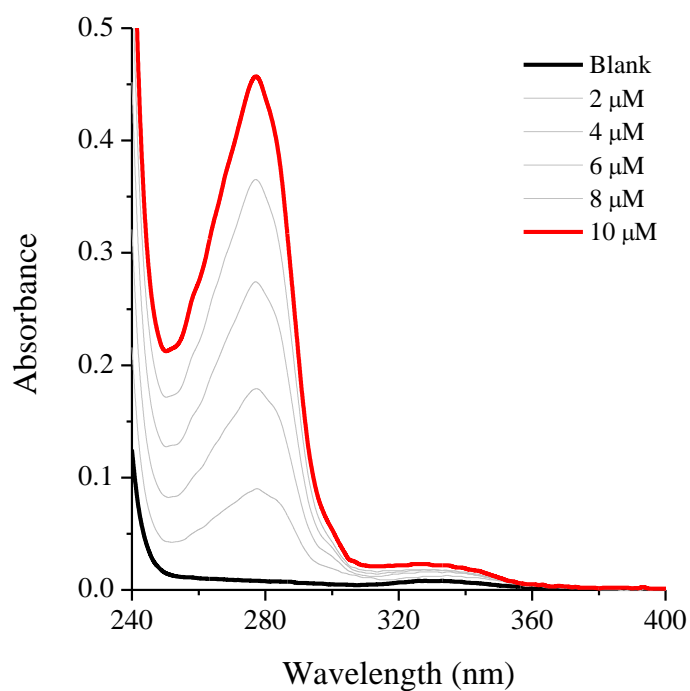

**Figure S7.** UV-Vis spectra of the benzazole 13 [2  $\mu\text{M}$ ] in different BSA concentrations [0-10  $\mu\text{M}$ ]. Blank sample is the UV-VIs in absence of BSA.

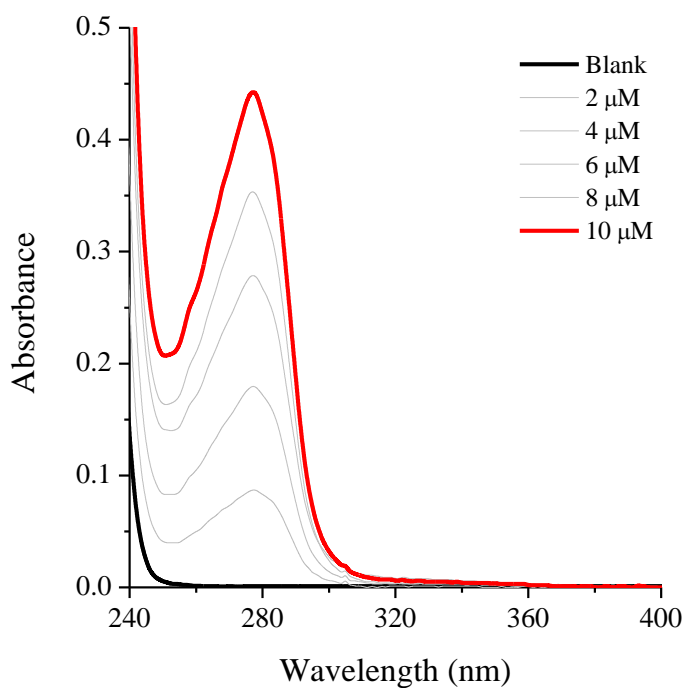

**Figure S8.** UV-Vis spectra of the benzazole 14 [2  $\mu\text{M}$ ] in different BSA concentrations [0-10  $\mu\text{M}$ ]. Blank sample is the UV-VIs in absence of BSA.

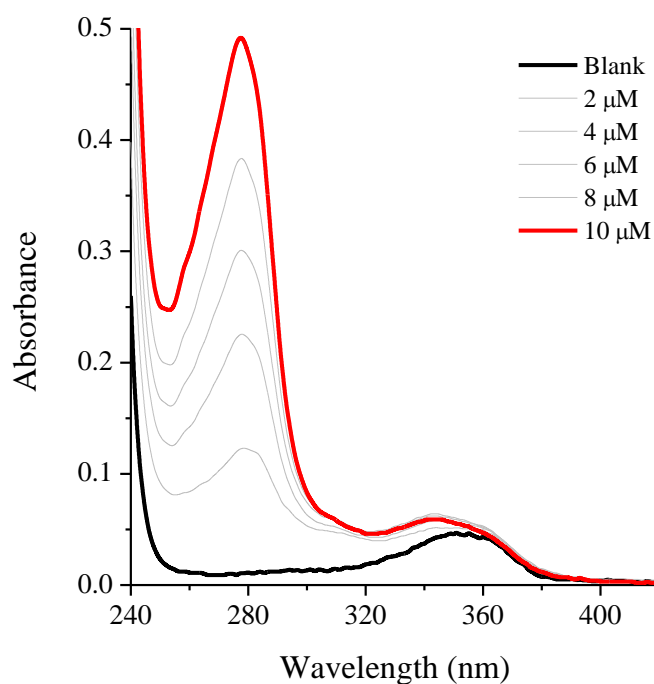

**Figure S9.** UV-Vis spectra of the benzazole 16 [2 μM] in different BSA concentrations [0-10 μM]. Blank sample is the UV-VIs in absence of BSA.

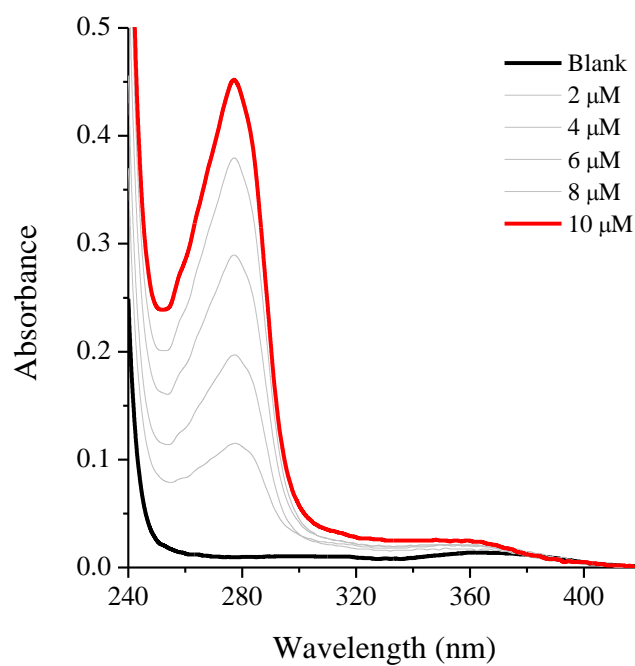

**Figure S10.** UV-Vis spectra of the benzazole 17 [2 μM] in different BSA concentrations [0-10 μM]. Blank sample is the UV-VIs in absence of BSA.

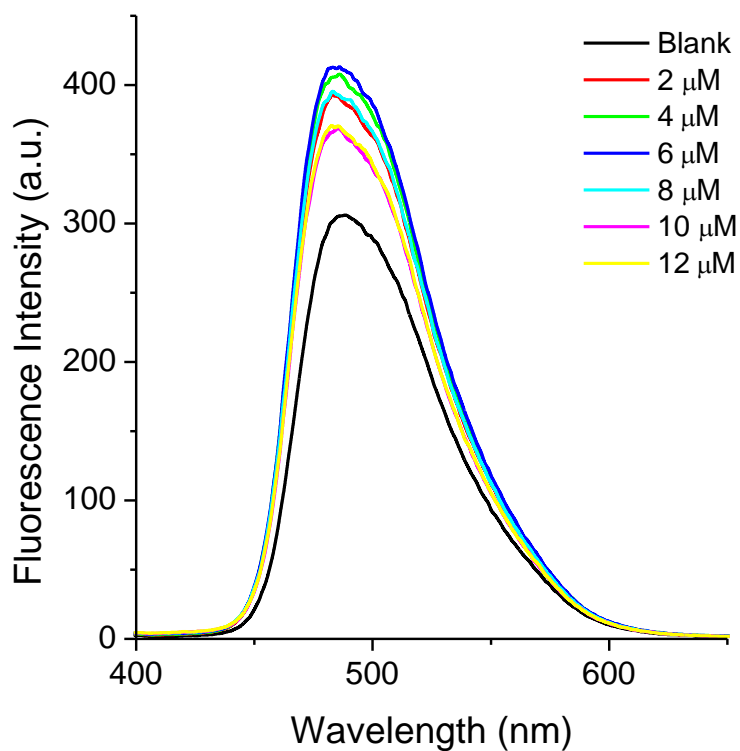

**Figure S11.** Fluorescence emission spectra of the benzazole 13 [2  $\mu\text{M}$ ] in different BSA concentrations [0-10  $\mu\text{M}$ ]. Blank sample is the UV-VIs in absence of BSA.

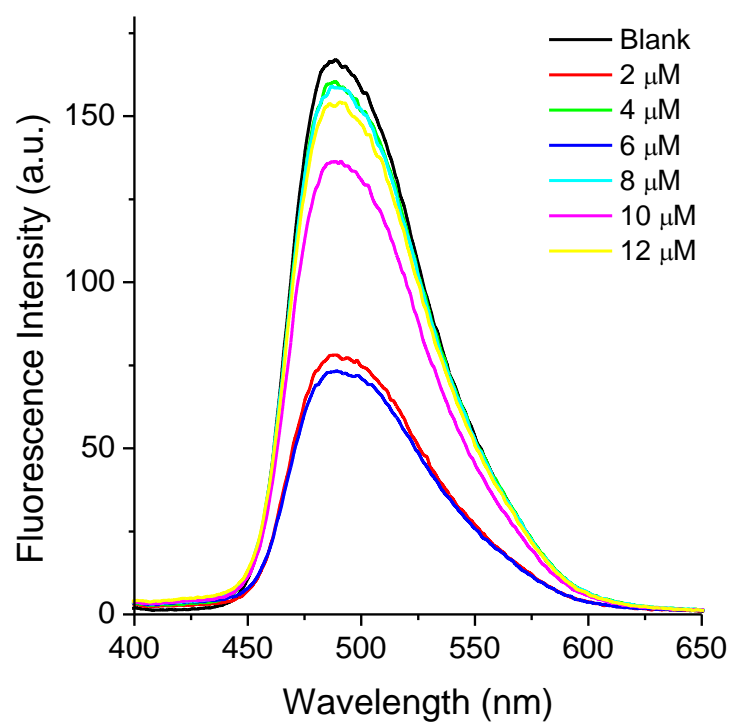

**Figure S12.** Fluorescence emission spectra of the benzazole 14 [2  $\mu\text{M}$ ] in different BSA concentrations [0-10  $\mu\text{M}$ ]. Blank sample is the UV-VIs in absence of BSA.



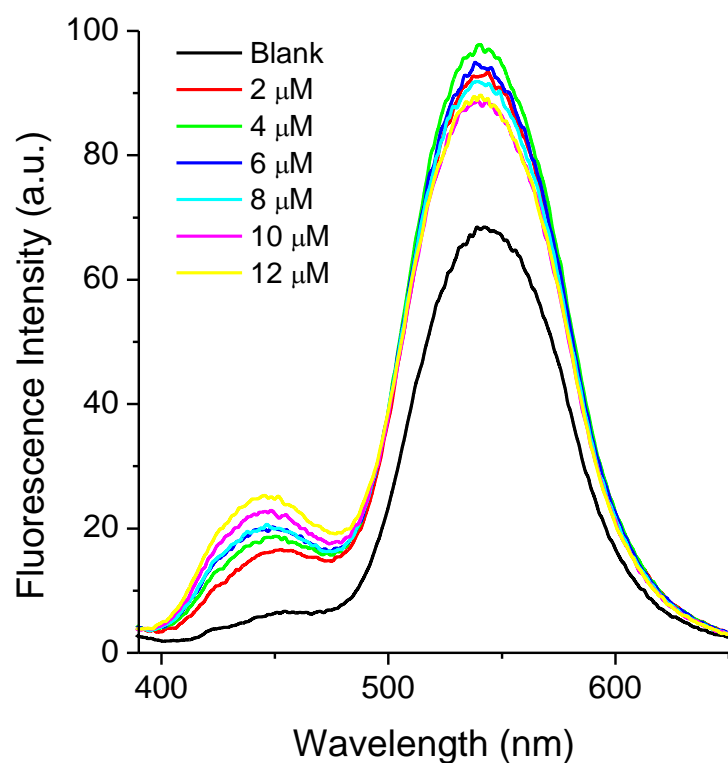

**Figure S13.** Fluorescence emission spectra of the benzazole 16 [2  $\mu$ M] in different BSA concentrations [0-10  $\mu$ M]. Blank sample is the UV-VIs in absence of BSA.

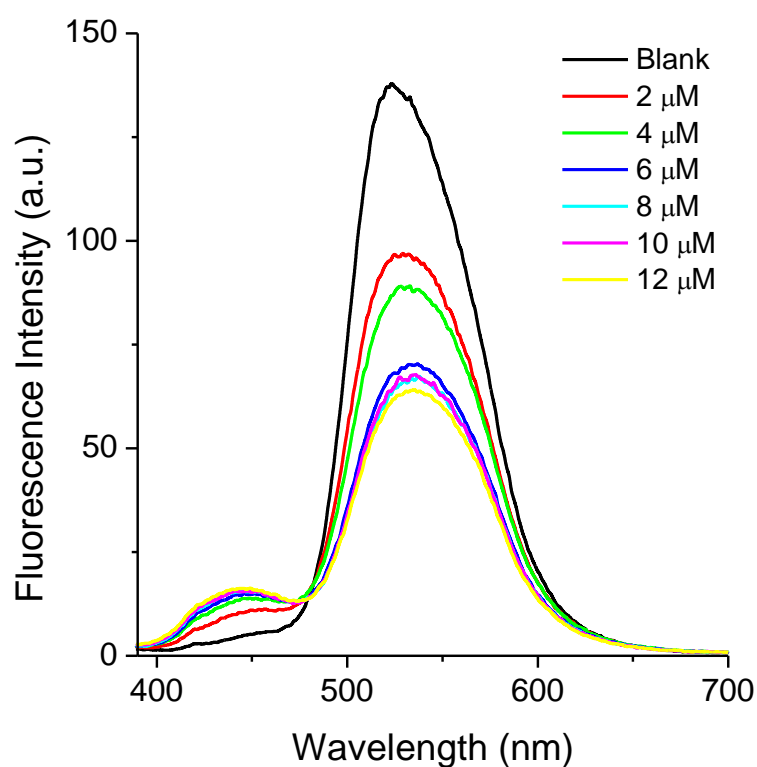

**Figure S14.** Fluorescence emission spectra of the benzazole 17 [2  $\mu$ M] in different BSA concentrations [0-10  $\mu$ M]. Blank sample is the UV-VIs in absence of BSA.

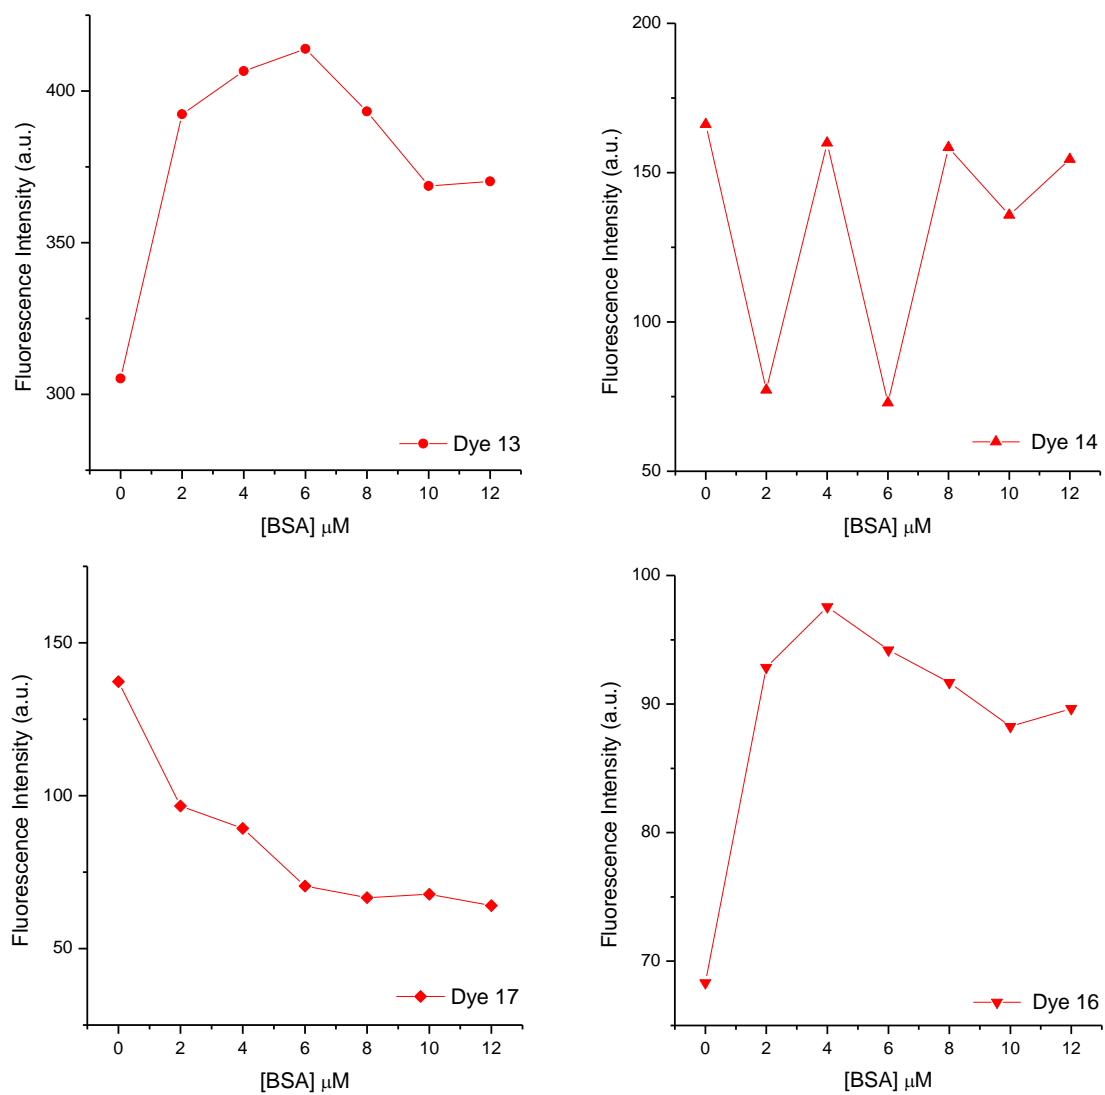

**Figure S15.** Plot of fluorescence intensity maxima as a function of BSA concentration.
